# Supplementary material for: Synthesis of Polypyrrole/Reduced Graphene Oxide Hybrids via Hydrothermal Treatment for Energy Storage Applications
Source: PubMed Central journal article supplement (PMC7287821; doi:10.3390/ma13102273), 2020-05-15
Supplement: materials-13-02273-s001.pdf [file materials-13-02273-s001.pdf]

Article

# Synthesis of Polypyrrole/Reduced Graphene Oxide Hybrids via Hydrothermal Treatment for Energy Storage Applications

Adam Moysiewicz, Krzysztof Pająk, Katarzyna Gajewska and Grażyna Gryglewicz \*

Department of Process Engineering and Technology of Polymer and Carbon Materials, Faculty of Chemistry, Wrocław University of Science and Technology, Gdańska 7/9, 50-344 Wrocław, Poland; adam.moysiewicz@pwr.edu.pl (A.M.); 204817@student.pwr.edu.pl (K.P.); 217791@student.pwr.edu.pl (K.G.)

\* Correspondence: grazyna.gryglewicz@pwr.edu.pl; Tel.: +48-71-320-6398; fax: +48-71-320-6506.

Received: 20 April 2020; Accepted: 12 May 2020; Published: date

## Preparation of Graphene Oxide

Briefly, 1 g of graphite was mixed with  $\text{NaNO}_3$  and concentrated  $\text{H}_2\text{SO}_4$ , followed by the addition of  $\text{KMnO}_4$  to the mixture under steady stirring, in which the temperature was maintained at  $35\text{ }^\circ\text{C}$  for 3 h. Afterwards, an aqueous solution of  $\text{H}_2\text{O}_2$  was introduced into the flask. The as-received product was washed with ultrapure Milli-Q water and centrifuged. Then, the graphite oxide was treated with diluted HCl and washed with water until a neutral pH was reached. An aqueous dispersion of GO ( $1.2\text{ mg mL}^{-1}$ ) was prepared via ultrasonication for 6 h.

## Electrochemical Measurements

The electrochemical performance of the materials was first investigated via cyclic voltammetry measurements (CV) at a scan rate of  $1\text{--}100\text{ mV s}^{-1}$  in the potential range of  $-0.65$  to  $0.25\text{ V}$ . Moreover, galvanostatic charge–discharge (GCD) experiments at current densities ranging from  $0.2$  to  $20\text{ A g}^{-1}$  and electrochemical impedance spectroscopy (EIS) measurements under an open circuit potential in the frequency range of  $100\text{ kHz}$  to  $10\text{ mHz}$  were performed. The reference and counter electrodes were  $\text{Hg}|\text{Hg}_2\text{SO}_4$  and pitch-based KOH-activated carbon, respectively. The PPy and PPy/GO electrodes were binder-free, containing 95 wt.% of the active material and 5 wt.% of carbon black (CB). The electrodes from rGO contained 90 wt.% of the active material, 5 wt.% of polyvinylidene fluoride (PVDF, Kynar Flex) and 5 wt.% of CB.

The specific capacitance ( $C_{\text{sp}}$ ,  $\text{F g}^{-1}$ ) of the electrode material can be calculated according to the following Equations (1) and (2):

$$C_{\text{sp}} = \frac{I\Delta t}{m\Delta V} \quad (1)$$

$$C_{\text{sp}} = \frac{\int IdV}{vm\Delta V} \quad (2)$$

where  $I$  is the discharge current (A),  $\Delta t$  is the discharge time (s),  $m$  is the mass of the active electrode material (g),  $\Delta V$  is the discharge potential window (V) and  $v$  is the scan rate ( $\text{V s}^{-1}$ ).

The specific energy ( $E$  in  $\text{Wh kg}^{-1}$ ) and specific power densities delivered ( $P$  in  $\text{kW kg}^{-1}$ ) by an adopted symmetric supercapacitor based on hybrid materials were calculated using Equations (3) and (4), respectively:

$$E = \frac{C_{\text{sp}}V^2}{8 \times 3.6} \quad (3)$$

$$P = \frac{E}{t} \quad (4)$$

where  $C_{sp}$  is the specific capacitance of the electrode ( $F g^{-1}$ ),  $V$  is the voltage (V) and  $t$  is the discharge time (s).

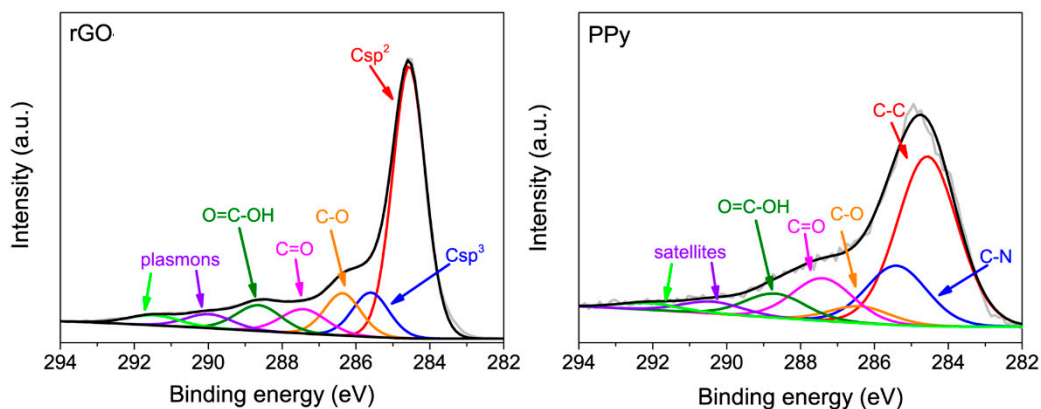

Figure S1. C1s high-resolution spectra of reduced graphene oxide (rGO) and polypyrrole (PPy).

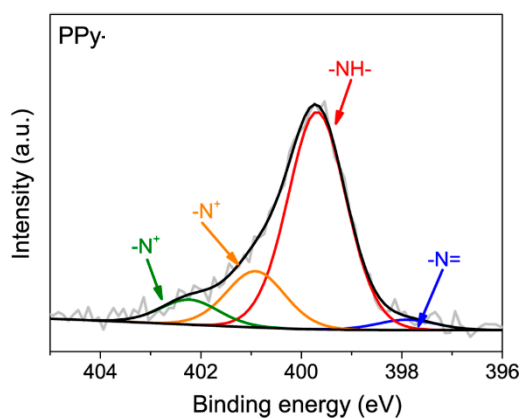

Figure S2. N1s high-resolution spectra of PPy.

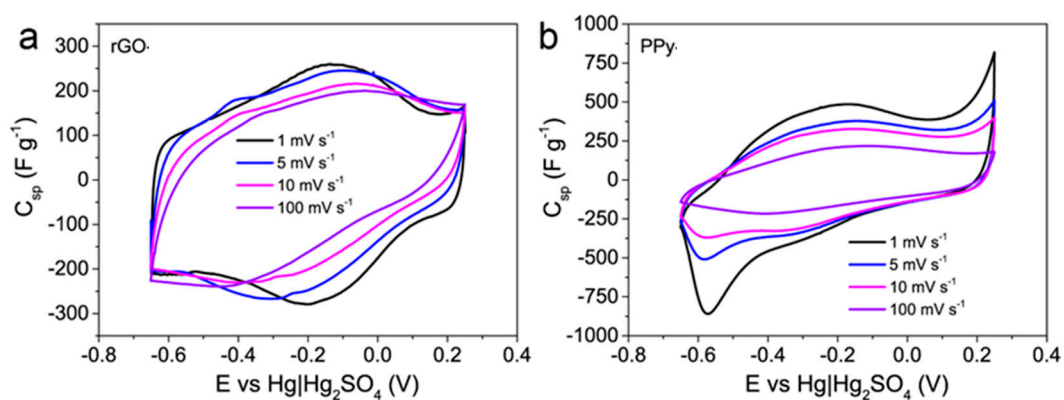

Figure S3. Cyclic voltammetry (CV) curves for (a) rGO and (b) PPy at the various scan rates in a 1 M  $H_2SO_4$  electrolyte.

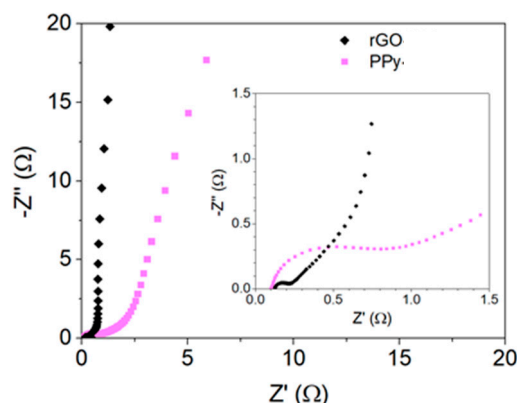

**Figure S4.** Nyquist plots of rGO and PPy with an inset representing the high-frequency range.

**Table S1.** Comparison of the PPy and carbon nanostructure composites' electrochemical performance in aqueous electrolytes.

| Material      | Specific Capacitance (F g <sup>-1</sup> )                         | Setup | Electrolyte                        | Cyclic Stability        | Energy Density (Wh kg <sup>-1</sup> ) | Ref.      |
|---------------|-------------------------------------------------------------------|-------|------------------------------------|-------------------------|---------------------------------------|-----------|
| PPy/RGO-10    | 255.7 at 0.2 A g <sup>-1</sup><br>199.6 at 25.6 A g <sup>-1</sup> | 2-EL  | 3 M KCl                            | 83% after 4000 cycles   | 7                                     | [1]       |
| RGO-PPyNTs    | 280 at 10 mV s <sup>-1</sup><br>160 at 100 mV s <sup>-1</sup>     | 3-EL  | 1 M KCl                            | 77.3% after 1000 cycles | 39                                    | [2]       |
| NTBP_PPy_Chem | 91 at 2 mV s <sup>-1</sup><br>14 at 100 mV s <sup>-1</sup>        | 3-EL  | 1 M H <sub>2</sub> SO <sub>4</sub> | 30% after 10,000 cycles | not reported                          | [3]       |
| GPG@MT        | 351 at 0.5 A g <sup>-1</sup><br>211 at 10 A g <sup>-1</sup>       | 2-EL  | 1 M H <sub>2</sub> SO <sub>4</sub> | 90% after 5000 cycles   | not reported                          | [4]       |
| PPy/GNS       | 315 at 0.5 A g <sup>-1</sup><br>220 at 5 A g <sup>-1</sup>        | 3-EL  | 1 M H <sub>2</sub> SO <sub>4</sub> | 96% after 1000 cycles   | 10.5                                  | [5]       |
| PPy-rGO-2     | 131 at 100 mV s <sup>-1</sup>                                     | 2-EL  | 1M CH <sub>3</sub> COOK/PVA        | 71% after 500 cycles    | not reported                          | [6]       |
| PPy/GO-HT-1:1 | 262 at 0.2 A g <sup>-1</sup><br>188 at 20 A g <sup>-1</sup>       | 3-EL  | 1 M H <sub>2</sub> SO <sub>4</sub> | 79% after 3000 cycles   | 7.4                                   | This work |
| PPy/GO-HT-1:9 | 250 at 0.2 A g <sup>-1</sup><br>198 at 20 A g <sup>-1</sup>       | 3-EL  | 1 M H <sub>2</sub> SO <sub>4</sub> | 92% after 3000 cycles   | 7                                     | This work |

Abbreviations: PPyNTs—polypyrrole nanotubes; NTBP—multiwalled carbon nanotubes buckypaper;

GPG@MT—rGO/PPy/rGO microtubes; GNS—graphene nanosheets.

## References

- Zhu, J.; Xu, Y.; Wang, J.; Wang, J.; Bai, Y.; Du, X. Morphology controllable nano-sheet polypyrrole-graphene composites for high-rate supercapacitor. *Phys. Chem. Chem. Phys.* **2015**, *17*, 19885–19894
- Devi, M.; Kumar, A. In-situ reduced graphene oxide nanosheets-polypyrrole nanotubes nanocomposites for supercapacitor applications. *Synth. Met.* **2016**, *222*, 318–329
- Iurchenkova, A.A.; Fedorovskaya, E.O.; Asanov, I.P.; Arkhipov, V.E.; Popov, K.M.; Baskakova, K.I.; Okotrub, A. V. MWCNT buckypaper/polypyrrole nanocomposites for supercapacitor application. *Electrochim. Acta* **2020**, *335*, 135700
- Yang, J.; Weng, W.; Liang, Y.; Zhang, Y.; Yang, L.; Luo, X.; Liu, Q.; Zhu, M. Heterogeneous graphene/polypyrrole multilayered microtube with enhanced capacitance. *Electrochim. Acta* **2019**, *304*, 378–385
- Zhang, D.; Zhang, X.; Chen, Y.; Yu, P.; Wang, C.; Ma, Y. Enhanced capacitance and rate capability of graphene/polypyrrole composite as electrode material for supercapacitors. *J. Power Sources* **2011**, *196*, 5990–5996

6. Abdul Bashid, H.A.; Lim, H.N.; Kamaruzaman, S.; Abdul Rashid, S.; Yunus, R.; Huang, N.M.; Yin, C.Y.; Rahman, M.M.; Altarawneh, M.; Jiang, Z.T.; et al. Electrodeposition of Polypyrrole and Reduced Graphene Oxide onto Carbon Bundle Fibre as Electrode for Supercapacitor. *Nanoscale Res. Lett.* **2017**, *12*, 1–10

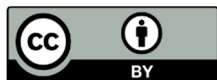

© 2020 by the authors. Submitted for possible open access publication under the terms and conditions of the Creative Commons Attribution (CC BY) license (<http://creativecommons.org/licenses/by/4.0/>).
